# Supplementary material
Source: PubMed Central journal article supplement (PMC4605445)
Supplement: Supp_Figure1.pdf [file Supp_Figure1.pdf]

## Supplementary Data

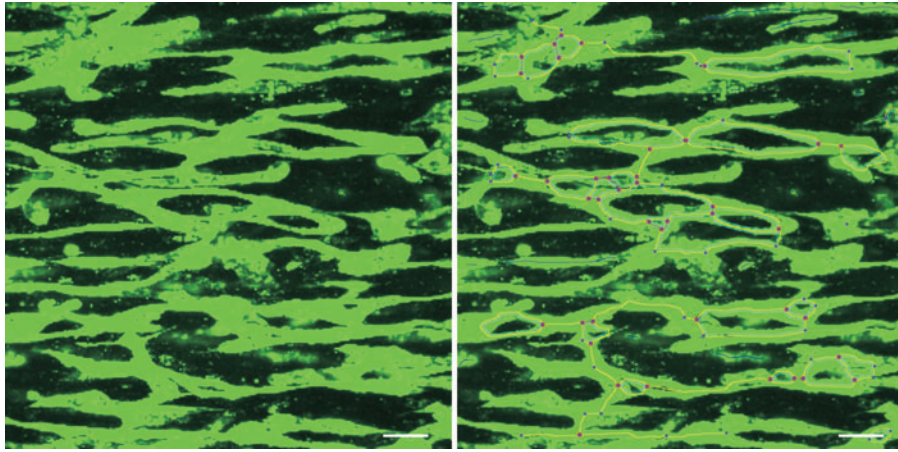

**SUPPLEMENTARY FIG. S1.** Quantification by Angiogenesis Analyzer (*right*) and original image (*left*) of endothelial network formation in a coculture bioartificial muscle (BAM). In the right image, there is an indication of master junctions (*pink dots*), master segments (*yellow*), meshes (*light blue*), branches (*green*), and isolated segments (*blue*). Scale bar indicates 50  $\mu\text{m}$ .
