# Supplementary material
Source: PubMed Central journal article supplement (PMC4605445)
Supplement: Supp_Figure2.pdf [file Supp_Figure2.pdf]

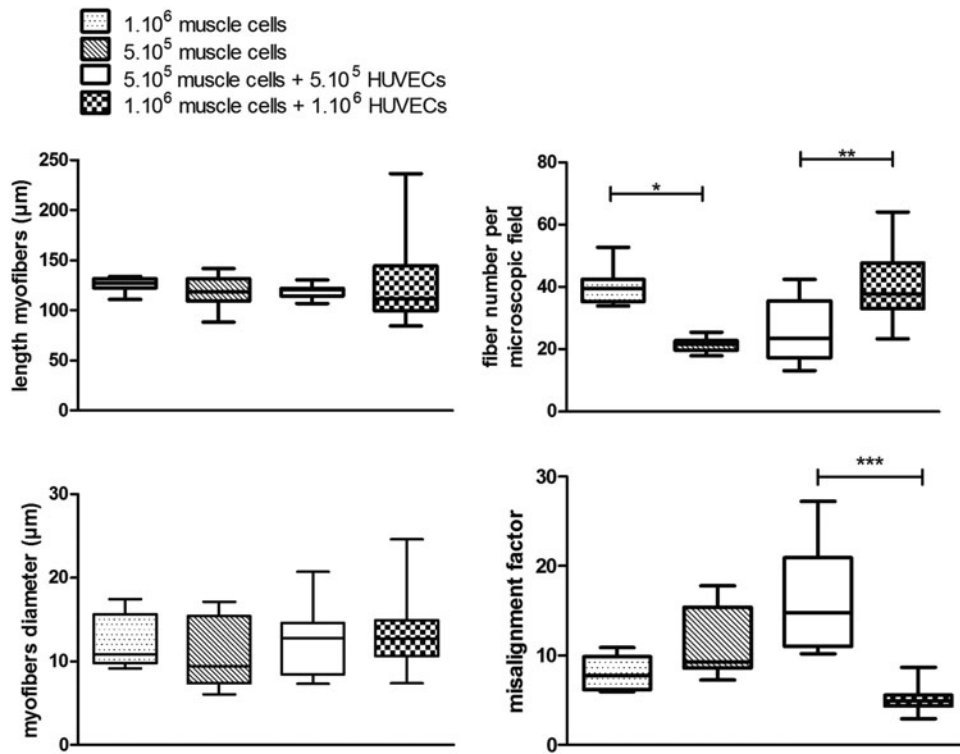

**SUPPLEMENTARY FIG. S2.** Myofiber formation in fibrin BAMs with  $0.5$  or  $1 \times 10^6$  muscle cells with or without  $0.5$  or  $1 \times 10^6$  human umbilical vein endothelial cells (HUVECs), respectively.
