# Supplementary material
Source: PubMed Central journal article supplement (PMC4605445)
Supplement: Supp_Figure3.pdf [file Supp_Figure3.pdf]

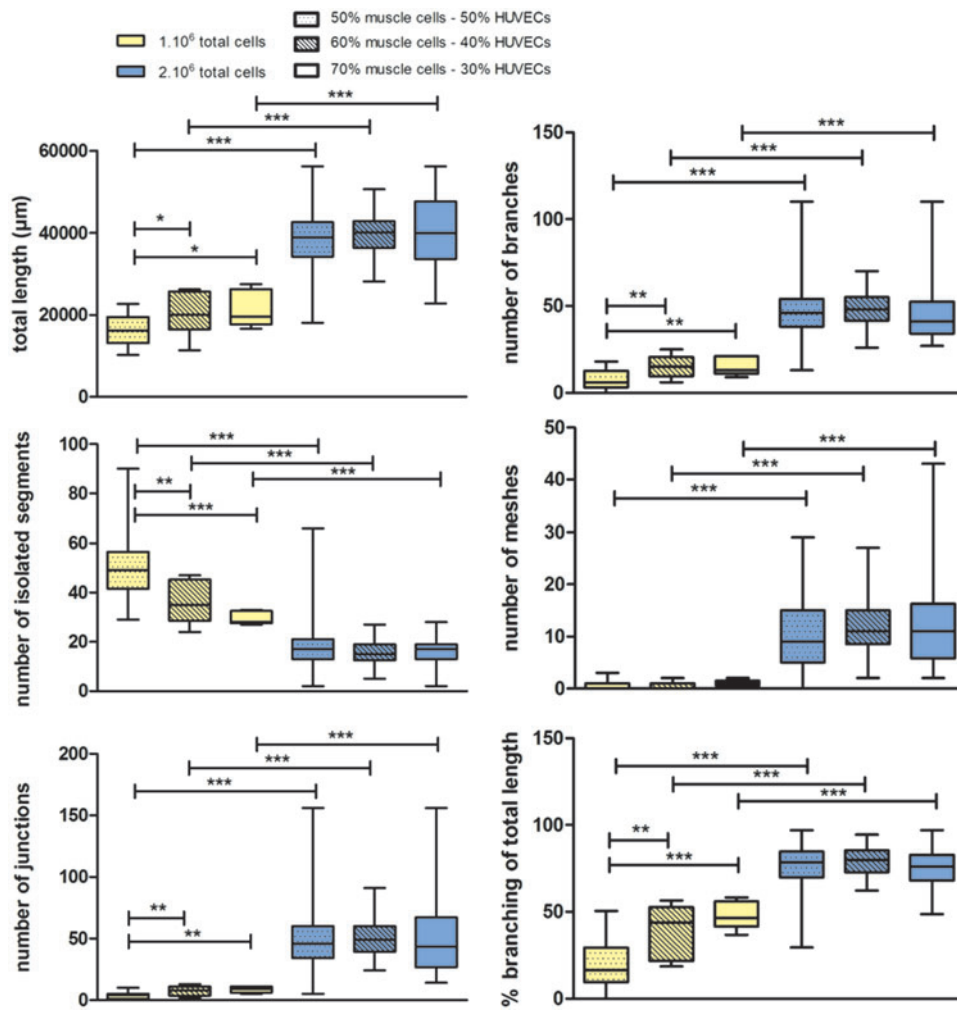

**SUPPLEMENTARY FIG. S3.** Endothelial network formation in coculture BAMs with different ratios of muscle cells and HUVECs in a total of  $1 \times 10^6$  or  $2 \times 10^6$  cells. This figure is a graphical representation of Table 3.
