# Supplementary material
Source: PubMed Central journal article supplement (PMC4605445)
Supplement: Supp_Figure5.pdf [file Supp_Figure5.pdf]

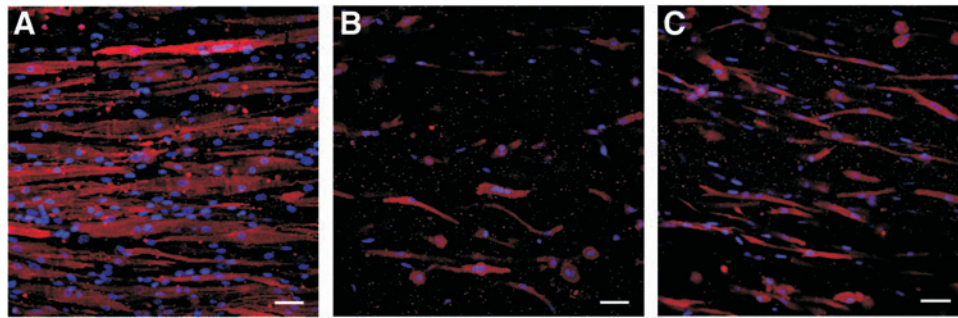

**SUPPLEMENTARY FIG. S5.** BAM with  $1 \times 10^6$  muscle cells in an extracellular matrix (ECM) of fibrin +10% Matrigel (**A** and **B** show outer and inner zones, respectively) and in a fibrin ECM without Matrigel (**C**). The outer zone of 20–30  $\mu\text{m}$  with Matrigel (**A**) shows well-aligned myofibers, which are longer than in the condition without Matrigel (**C**), whereas the inner zone (**B**) shows less well-aligned myofibers compared with the condition shown in (**C**). Tropomyosin staining (*red*) shows myofibers, DAPI (*blue*) shows cell nuclei.
